# Supplementary material for: Integrated microbiome and metabolomics analysis reveal the relationship between plant-specialized metabolites and microbial community in Phellodendron amurense
Source: Frontiers journal article supplement (doi:10.3389/fpls.2024.1363063), 2024-02-21
Supplement: Data_Sheet_1.PDF [file Data_Sheet_1.PDF]

### A Bacteria

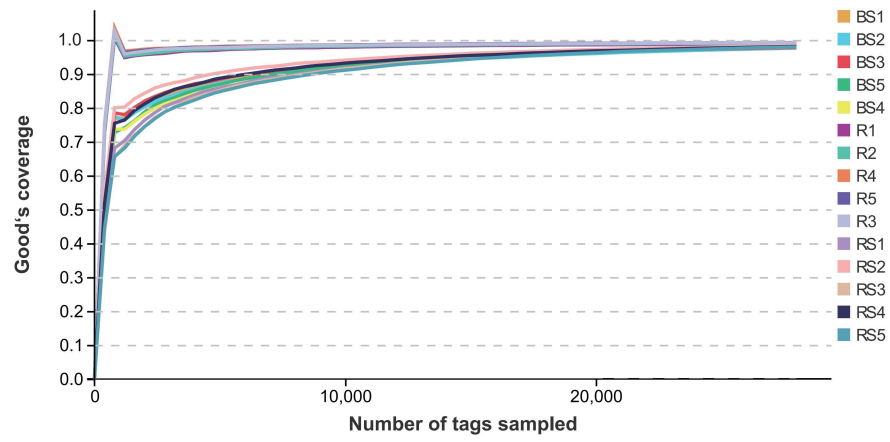

### B Fungi

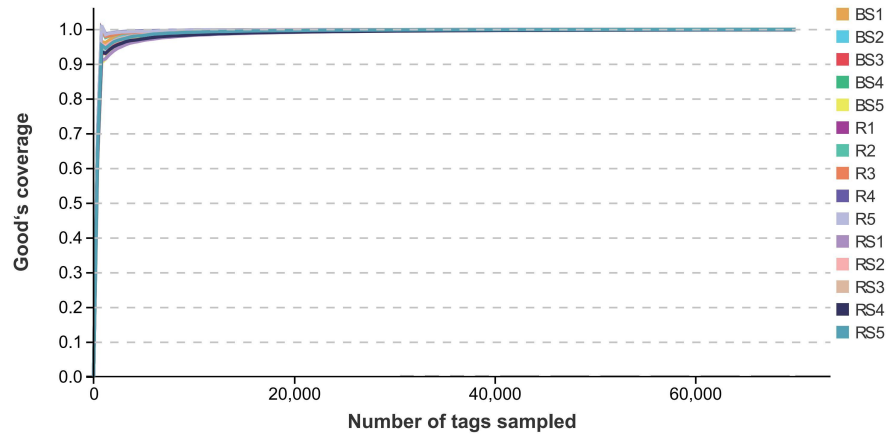

**Figure S1.** Rarefaction curves for the sequencing data of *Phellodendron amurense* roots (R), rhizosphere soil (RS) and bulk soil (BS). **(A)** Bacteria. **(B)** Fungi.

**A Bacteria Kruskal-Wallis test**

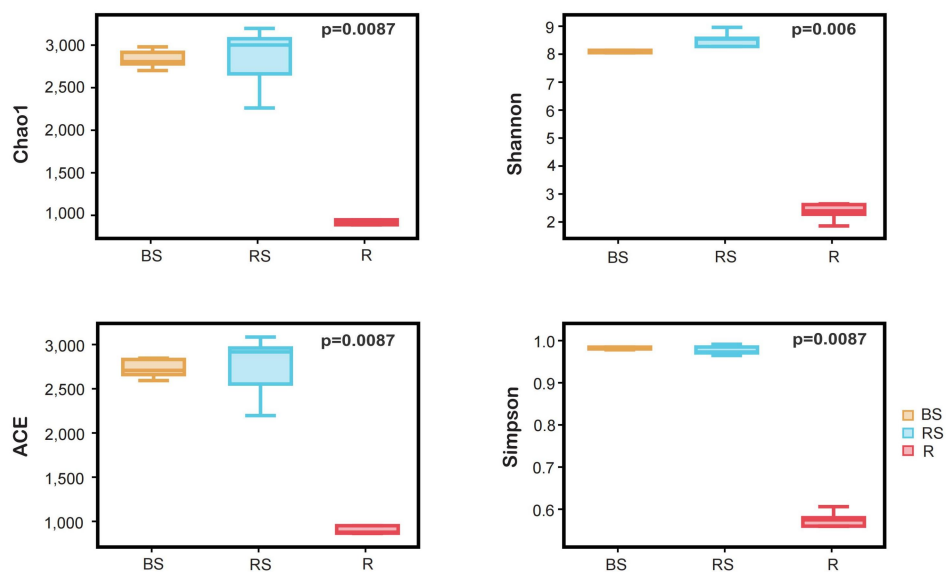

**B Fungi Kruskal-Wallis test**

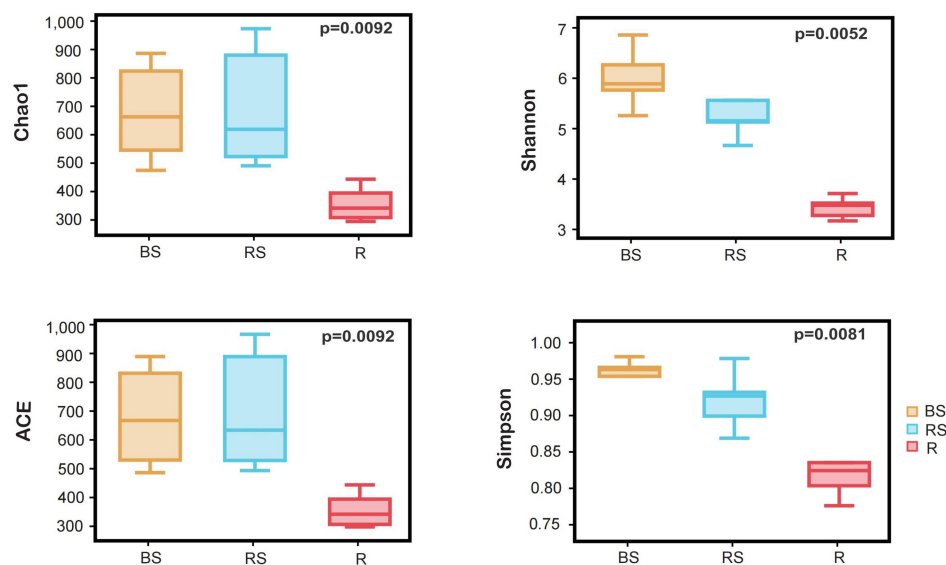

**Figure S2.** Alpha diversity of microbial communities associated with *Phellodendron amurense* (Kruskal-Wallis test). **(A)** Bacteria. **(B)** Fungi. BS, RS and R represent bulk soil, rhizosphere soil and roots, respectively.

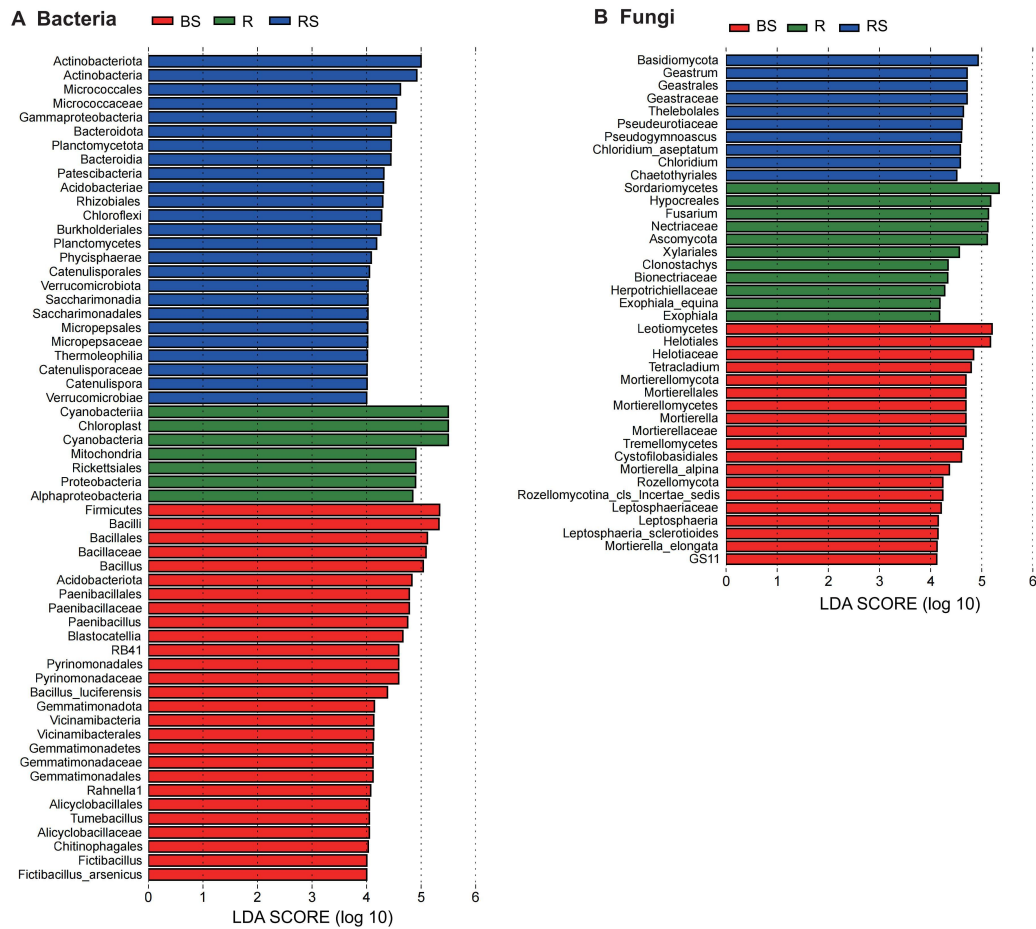

**Figure S3.** Linear discriminant analysis (LDA) across roots (R), rhizosphere soil (RS) and bulk soil (BS) samples of *Phellodendron amurense*. All linear discriminant analysis (LDA) scores > 4. (A) Bacteria. (B) Fungi.
