# Supplementary material for: Integrated microbiome and metabolomics analysis reveal the relationship between plant-specialized metabolites and microbial community in Phellodendron amurense
Source: Front Plant Sci. 2024 Feb 21;15:1363063. doi: 10.3389/fpls.2024.1363063 (PMC10915045; doi:10.3389/fpls.2024.1363063)
Supplement: Supplementary file 2 [file Table_1.xlsx]

## Sheet: Sheet1
NO.a	tRb (min)	Identification	Molecular formula	Parent ionc (m/z)	Fragmentation profile (m/z)	typeⅠ	typeⅡ	typeⅢ
1	5.305	Norcoclaurine	C16H17NO3	272.1281 [M+H]+	107.0495, 161.0595, 123.0439, 143.0490	alkaloid	Isoquinoline-type	benzylisoquinoline
2	5.672	N-Methylhigenamine-7-O-glucopyranoside		448.1901 [M+H]+	286.1400, 255.0968	alkaloid	Isoquinoline-type	benzylisoquinoline
3	5.71	(−)-Oblongine	C19H24NO3	315.1829 [M+H]+	107.0464, 270.1165, 176.0743	alkaloid	Isoquinoline-type	benzylisoquinoline
4	5.71	Lotusine	C19H24NO3	315.1829 [M+H]+	107.0464, 270.1165, 176.0743	alkaloid	Isoquinoline-type	benzylisoquinoline
5	5.814	Phellodendrine	C20H24NO4	342.1692 [M]+	177.0815, 192.1117, 148.0730, 190.0826	alkaloid	Isoquinoline-type	protoberberine
6	5.911	Tembetarine	C20H26NO4	344.1814 [M]+	267.0959, 192.0980, 177.0856	alkaloid	Isoquinoline-type	benzylisoquinoline
7	5.967	Magnoflorine	C20H24NO4	342.1687 [M]+	265.0832, 297.1063, 237.0860, 282.0836	alkaloid	Isoquinoline-type	aporphine
8	5.967	Tetrahydrocolumbamine	C20H23NO4	342.1654 [M+H]+	297.1063, 265.0832, 282.0836, 237.0860	alkaloid	Isoquinoline-type	protoberberine
9	5.967	Tetrahydrojatrorrhizine	C20H23NO4	342.1654 [M+H]+	297.1063, 265.0832, 282.0836, 237.0860	alkaloid	Isoquinoline-type	protoberberine
10	6.215	Magnocurarine	C19H24NO3	314.1551 [M]+	107.0471, 237.0860, 254.0872	alkaloid	Isoquinoline-type	benzylisoquinoline
11	6.24	8-Oxopalmatine	C21H21NO5	368.1493 [M+H]+	338.0950, 353.1182, 310.1009	alkaloid	Isoquinoline-type	protoberberine
12	6.374	3-O-Feruloylquinic acid	C17H20O9	386.1400 [M+NH4]+	177.0506, 117.0304	Quinic acid
13	6.399	(+) N-Methylcorydine	C21H26NO4	356.1785 [M]+	311.1203, 279.0955, 251.1007	alkaloid	Isoquinoline-type	aporphine
14	6.399	Menisperine	C21H26NO4	356.1935 [M]+	264.0727, 279.0955, 248.0781, 296.0978	alkaloid	Isoquinoline-type	aporphine
15	6.607	Evodiamine	C19H17N3O	304.1474 [M+H]+	144.0768, 128.0578	alkaloid	indole-type	monoterpenoid indole
16	6.621	Coclaurine	C17H19NO3	286.1338 [M+H]+	256.0913, 271.1129, 254.1120	alkaloid	Isoquinoline-type	benzylisoquinoline
17	6.645	Tetrahydropalmatine	C21H25NO4	356.1863 [M+H]+	192.1119, 356.1774, 190.0821	alkaloid	Isoquinoline-type	protoberberine
18	6.722	8-Oxoberberine	C20H17NO5	352.1104 [M+H]+	337.0877, 308.0852, 322.0641, 294.0696	alkaloid	Isoquinoline-type	protoberberine
19	6.722	8-Oxoepiberberine	C20H17NO5	352.1104 [M+H]+	337.0877, 308.0852, 322.0641, 294.0696	alkaloid	Isoquinoline-type	protoberberine
20	5.971	Scoulerine	C19H21NO4	328.2 [M+H]+	177.0717, 121.0618, 144.0524	alkaloid	Isoquinoline-type	protoberberine
21	6.973	Jatrorrhizine	C19H21NO4	338.1388 [M]+	323.1077, 322.1019, 294.1061, 265.0685	alkaloid	Isoquinoline-type	protoberberine
22	6.985	Columbamine	C20H20NO4	339.1465 [M+H]+	323.1039, 309.0883, 295.1097, 266.0704	alkaloid	Isoquinoline-type	protoberberine
23	7.178	Tetrahydroberberine	C20H21NO4	340.1467 [M+H]+	176.0666, 340.1469, 149.0563	alkaloid	Isoquinoline-type	protoberberine
24	7.26	Palmatine	C21H22NO4	352.1553 [M]+	336.1167, 308.1211, 294.1054, 322.1002, 337.1245	alkaloid	Isoquinoline-type	protoberberine
25	7.303	Berberine	C20H18NO4	336.1224 [M]+	320.1004, 278.0842, 292.1038, 306.0777, 321.0874	alkaloid	Isoquinoline-type	protoberberine
26	9.129	Skimmianine	C14H13NO4	260.0918 [M+H]+	227.0523, 199.0604, 216.0600, 184.0357, 245.0618	alkaloid	quinoline-type
27	9.259	γ-Fagarine	C13H11NO3	230.0812 [M+H]+	215.0523, 200.0295	alkaloid	quinoline-type
28	9.459	Obaculactone	C26H30O8	488.2155 [M+NH4]+	425.1851, 161.0555, 367.1862	Limonoid
29	10.272	Obacunone	C26H30O7	455.1970 [M+H]+	427.1951, 409.1892	Limonoid
30	10.604	Rutaecarpine	C18H13N3O	288.1132 [M+H]+	273.0808, 169.0711, 243.0841, 144.0750	alkaloid	indole-type	monoterpenoid indole
31	10.907	N-Methylflindersine	C15H15NO2	242.1176 [M+H]+	212.0652, 188.0654, 226.0806	alkaloid	other alkaloids
